# Supplementary material for: Exploring the Science behind Bifidobacterium breve M-16V in Infant Health
Source: PubMed Central journal article supplement (PMC6723912; doi:10.3390/nu11081724), 2019-07-25
Supplement: nutrients-11-01724-s001.pdf [file nutrients-11-01724-s001.pdf]

Table S1. Summary of publications related to *Bifidobacterium breve* M-16V.

| Intervention                          | Study model/subject       | Target                      | Number of studies |
|---------------------------------------|---------------------------|-----------------------------|-------------------|
| Grand total                           |                           |                             | 60                |
| Single strain of M-16V                |                           |                             | 31                |
|                                       | <i>In vitro</i> /mice/rat | Total                       | 16                |
|                                       |                           | Preterm birth complications | 1                 |
|                                       |                           | Allergy                     | 3                 |
|                                       |                           | Safety/stability            | 5                 |
|                                       |                           | Gut microbiota/others       | 7                 |
|                                       | Infant                    | Total                       | 14                |
|                                       |                           | Preterm birth complications | 11                |
|                                       |                           | Allergy                     | 3                 |
|                                       |                           | Safety/stability            | 0                 |
|                                       | Children/adults/others    | Gut microbiota/others       | 0                 |
|                                       |                           | Total                       | 1                 |
|                                       |                           | Preterm birth complications | 0                 |
|                                       |                           | Allergy                     | 0                 |
|                                       |                           | Safety/stability            | 0                 |
|                                       |                           | Gut microbiota/others       | 1                 |
| Probiotics mixture with other strains |                           |                             | 5                 |
|                                       | <i>In vitro</i> /mice/rat | Total                       | 0                 |
|                                       |                           | Preterm birth complications | 0                 |
|                                       |                           | Allergy                     | 0                 |
|                                       |                           | Safety/stability            | 0                 |
|                                       |                           | Gut microbiota/others       | 0                 |
|                                       | Infant                    | Total                       | 2                 |
|                                       |                           | Preterm birth complications | 1                 |
|                                       |                           | Allergy                     | 1                 |
|                                       |                           | Safety/stability            | 0                 |
|                                       | Children/adults/others    | Gut microbiota/others       | 0                 |
|                                       |                           | Total                       | 3                 |
|                                       |                           | Preterm birth complications | 0                 |
|                                       |                           | Allergy                     | 1                 |
|                                       |                           | Safety/stability            | 0                 |
|                                       |                           | Gut microbiota/others       | 2                 |
| Synbiotics                            |                           |                             | 24                |
|                                       | <i>In vitro</i> /mice/rat | Total                       | 10                |
|                                       |                           | Preterm birth complications | 0                 |
|                                       |                           | Allergy                     | 6                 |
|                                       |                           | Safety/stability            | 0                 |
|                                       |                           | Gut microbiota/others       | 4                 |
|                                       | Infant                    | Total                       | 11                |
|                                       |                           | Preterm birth complications | 1                 |
|                                       |                           | Allergy                     | 8                 |
|                                       |                           | Safety/stability            | 0                 |
|                                       | Children/adults/others    | Gut microbiota/others       | 2                 |
|                                       |                           | Total                       | 3                 |
|                                       |                           | Preterm birth complications | 0                 |
|                                       |                           | Allergy                     | 2                 |
|                                       |                           | Safety/stability            | 0                 |
|                                       |                           | Gut microbiota/others       | 1                 |

Table S2. Articles related to *Bifidobacterium breve* M-16V

| No.                                           | Inter-vention | Study model/<br>subject | Target  | Article          | Title                                                                                                                                                                                                                                                             | Authors                                                                                                                                                                                                                             | Publisher                                         | Year | DOI                      |
|-----------------------------------------------|---------------|-------------------------|---------|------------------|-------------------------------------------------------------------------------------------------------------------------------------------------------------------------------------------------------------------------------------------------------------------|-------------------------------------------------------------------------------------------------------------------------------------------------------------------------------------------------------------------------------------|---------------------------------------------------|------|--------------------------|
| <i>Articles obtained from database search</i> |               |                         |         |                  |                                                                                                                                                                                                                                                                   |                                                                                                                                                                                                                                     |                                                   |      |                          |
| 1*                                            | M-16V         | Infant                  | Preterm | Review           | Bifidobacterium breve M-16V as a Probiotic for Preterm Infants: A Strain-Specific Systematic Review                                                                                                                                                               | Athalye-Jape, Gayatri; Rao, Shripada; Simmer, Karen; Patole, Sanjay                                                                                                                                                                 | JPEN. Journal of parenteral and enteral nutrition | 2018 | 10.1177/0148607117722749 |
| 2                                             | M-16V         | Infant                  | Allergy | Original article | Exploring Immune Development in Infants With Moderate to Severe Atopic Dermatitis                                                                                                                                                                                 | Hulshof, Lies; Overbeek, Saskia A; Wyllie, Anne L; Chu, Mei Ling J N; Bogaert, Debby; de Jager, Wilco; Knippels, Leon M J; Sanders, Elisabeth A M; van Aalderen, Wim M C; Garssen, Johan; Van't Land, Belinda; Sprikkelman, Aline B | Frontiers in immunology                           | 2018 | 10.3389/fimmu.2018.00630 |
| 3                                             | M-16V         | Infant                  | Preterm | Original article | Effect of probiotics on C-reactive protein levels in preterm infants: Secondary analysis of a randomized controlled trial                                                                                                                                         | Agrawal, S; Rao, S; Nathan, E A; Patole, S                                                                                                                                                                                          | Journal of neonatal-perinatal medicine            | 2018 | 10.3233/NPM-181763       |
| 4                                             | M-16V         | Infant                  | Preterm | Original article | Probiotics and antimicrobial protein and peptide levels in preterm infants                                                                                                                                                                                        | Strunk, Tobias; Hibbert, Julie; Doherty, Dorota; Granland, Caitlyn; Trend, Stephanie; Simmer, Karen; Burgner, David; Patole, Sanjay; Currie, Andrew                                                                                 | Acta paediatrica                                  | 2017 | 10.1111/apa.13826        |
| 5                                             | M-16V         | Mice                    | Allergy | Original article | Dietary Intervention with $\beta$ -Lactoglobulin-Derived Peptides and a Specific Mixture of Fructo-Oligosaccharides and Bifidobacterium breve M-16V Facilitates the Prevention of Whey-Induced Allergy in Mice by Supporting a Tolerance-Prone Immune Environment | Kostadinova, Atanaska I; Pablos-Tanarro, Alba; Diks, Mara A P; van Esch, Betty C A M; Garssen, Johan; Knippels, Léon M J; Willemsen, Linette E M                                                                                    | Frontiers in immunology                           | 2017 | 10.3389/fimmu.2017.01303 |
| 6                                             | M-16V         | Rat                     | Immune  | Original article | Differences between live and heat-killed bifidobacteria in the regulation of immune function and the intestinal environment                                                                                                                                       | Sugahara, H; Yao, R; Odamaki, T; Xiao, J Z                                                                                                                                                                                          | Beneficial microbes                               | 2017 | 10.3920/BM2016.0158      |

| No. | Intervention | Study model/<br>subject | Target  | Article          | Title                                                                                                                                                       | Authors                                                                                                                                                             | Publisher                                           | Year | DOI                            |
|-----|--------------|-------------------------|---------|------------------|-------------------------------------------------------------------------------------------------------------------------------------------------------------|---------------------------------------------------------------------------------------------------------------------------------------------------------------------|-----------------------------------------------------|------|--------------------------------|
| 7*  | M-16V        | Infant                  | Preterm | Original article | Effect of Bifidobacterium breve M-16V supplementation on faecal bifidobacteria in growth restricted very preterm infants - analysis from a randomised trial | Patole, Sanjay K; Keil, Anthony D; Nathan, Elizabeth; Doherty, Dorota; Esvaran, Meera; Simmer, Karen N; Conway, Patricia                                            | The journal of maternal-fetal & neonatal medicine   | 2016 | 10.3109/14767058.2016.1147554. |
| 8   | M-16V        | Rat                     | Immune  | Original article | Preclinical Immunomodulation by the Probiotic Bifidobacterium breve M-16V in Early Life                                                                     | Rigo-Adrover, Maria Del Mar; Franch, Àngels; Castell, Margarida; Pérez-Cano, Francisco José                                                                         | PloS one                                            | 2016 | 10.1371/journal.pone.0166082   |
| 9   | M-16V        | Children                | IBS     | Review           | Probiotics for Irritable Bowel Syndrome: Clinical Data in Children                                                                                          | Giannetti, Eleonora; Staiano, Annamaria                                                                                                                             | Journal of pediatric gastroenterology and nutrition | 2016 | 10.1097/MPG.00000000000001220  |
| 10* | M-16V        | Infant                  | Preterm | Original article | Benefits of Bifidobacterium breve M-16V Supplementation in Preterm Neonates - A Retrospective Cohort Study                                                  | Patole, Sanjay K; Rao, Shripada C; Keil, Anthony D; Nathan, Elizabeth A; Doherty, Dorota A; Simmer, Karen N                                                         | PloS one                                            | 2016 | 10.1371/journal.pone.0150775   |
| 11* | M-16V        | Rat                     | Preterm | Original article | Bifidobacterium breve prevents necrotising enterocolitis by suppressing inflammatory responses in a preterm rat model                                       | Satoh, T; Izumi, H; Iwabuchi, N; Odamaki, T; Namba, K; Abe, F; Xiao, J Z                                                                                            | Beneficial microbes                                 | 2016 | 10.3920/BM2015.0035            |
| 12* | M-16V        | Rat                     | DSS     | Original article | Bifidobacterium breve alters immune function and ameliorates DSS-induced inflammation in weanling rats                                                      | Izumi, Hirohisa; Minegishi, Mario; Sato, Yohei; Shimizu, Takashi; Sekine, Kazunori; Takase, Mitsunori                                                               | Pediatric research                                  | 2015 | 10.1038/pr.2015.115            |
| 13* | M-16V        | Infant                  | Preterm | Original article | Effect of Bifidobacterium breve M-16V supplementation on fecal bifidobacteria in preterm neonates--a randomised double blind placebo controlled trial       | Patole, Sanjay; Keil, Anthony D; Chang, Annie; Nathan, Elizabeth; Doherty, Dorota; Simmer, Karen; Esvaran, Meera; Conway, Patricia                                  | PloS one                                            | 2014 | 10.1371/journal.pone.0089511   |
| 14* | M-16V        | <i>In vitro</i>         | Immune  | Original article | Immunoregulatory effect of bifidobacteria strains in porcine intestinal epithelial cells through modulation of ubiquitin-editing enzyme A20 expression      | Tomosada, Yohsuke; Villena, Julio; Murata, Kozue; Chiba, Eriko; Shimazu, Tomoyuki; Aso, Hisashi; Iwabuchi, Noriyuki; Xiao, Jinzhong; Saito, Tadao; Kitazawa, Haruki | PloS one                                            | 2013 | 10.1371/journal.pone.0059259   |

| No. | Inter-vention | Study model/<br>subject | Target  | Article          | Title                                                                                                                                | Authors                                                                                                                                                            | Publisher                                           | Year | DOI                                |
|-----|---------------|-------------------------|---------|------------------|--------------------------------------------------------------------------------------------------------------------------------------|--------------------------------------------------------------------------------------------------------------------------------------------------------------------|-----------------------------------------------------|------|------------------------------------|
| 15* | M-16V         | Rat                     | Immune  | Original article | Effects of Bifidobacterium breve on inflammatory gene expression in neonatal and weaning rat intestine                               | Ohtsuka, Yoshikazu; Ikegami, Takako; Izumi, Hirohisa; Namura, Mariko; Ikeda, Tomomi; Ikuse, Tamaki; Baba, Yosuke; Kudo, Takahiro; Suzuki, Ryuyo; Shimizu, Toshiaki | Pediatric research                                  | 2012 | 10.1038/pr.2011.11                 |
| 16  | M-16V         | <i>In vitro</i>         | Immune  | Original article | Bifidobacterium breve - HT-29 cell line interaction: modulation of TNF- $\alpha$ induced gene expression                             | Boesten, R J; Schuren, F H J; Willemsen, L E M; Vriesema, A; Knol, J; De Vos, W M                                                                                  | Beneficial microbes                                 | 2011 | 10.3920/BM2011.0005                |
| 17  | M-16V         | Infant                  | Preterm | Original article | Beneficial microbes for premature infants, and children with malignancy undergoing chemotherapy                                      | Yamashiro, Y; Nagata, S                                                                                                                                            | Beneficial microbes                                 | 2010 | 10.3920/BM2010.0035                |
| 18* | M-16V         | Mice                    | Safety  | Original article | Safety evaluation of probiotic bifidobacteria by analysis of mucin degradation activity and translocation ability                    | Abe, Fumiaki; Muto, Masamichi; Yaeshima, Tomoko; Iwatsuki, Keiji; Aihara, Hiroaki; Ohashi, Yuji; Fujisawa, Tomohiko                                                | Anaerobe                                            | 2010 | 10.1016/j.anaerobe.2009.07.006     |
| 19* | M-16V         | Mice                    | Allergy | Original article | Oral treatment with probiotics reduces allergic symptoms in ovalbumin-sensitized mice: a bacterial strain comparative study          | Hougee, S; Vriesema, A J M; Wijering, S C; Knippels, L M J; Folkerts, G; Nijkamp, F P; Knol, J; Garssen, J                                                         | International archives of allergy and immunology    | 2010 | 10.1159/000236000                  |
| 20* | M-16V         | Rat                     | Allergy | Original article | Suppressive effects of bifidobacterium breve strain M-16V on T-helper type 2 immune responses in a murine model                      | Inoue, Yumi; Iwabuchi, Noriyuki; Xiao, Jin-Zhong; Yaeshima, Tomoko; Iwatsuki, Keiji                                                                                | Biological & pharmaceutical bulletin                | 2009 | 10.1248/bpb.32.760                 |
| 21* | M-16V         | Infant                  | Preterm | Original article | Effects of oral administration of bifidobacterium breve on fecal lactic acid and short-chain fatty acids in low birth weight infants | Wang, Chongxin; Shoji, Hiromichi; Sato, Hiroaki; Nagata, Satoru; Ohtsuka, Yoshikazu; Shimizu, Toshiaki; Yamashiro, Yuichiro                                        | Journal of pediatric gastroenterology and nutrition | 2007 | 10.1097/01.mpg.0000252184.89922.5f |
| 22* | M-16V         | Infant                  | Allergy | Original article | Administration of Bifidobacterium to infants with atopic dermatitis: Changes in fecal microflora and clinical symptoms               | Taniuchi, Shoichiro; Hattori, Kazuhiro; Yamamoto, Akemi; Sasai, Misa; Hatano, Yasuko; Kojima, Takatsugu; Kobayashi, Yohnosuke; Iwamoto, Hiroshi; Yaeshima, Tomoko  | Journal of Applied Research                         | 2005 | -                                  |

| No. | Inter-vention | Study model/<br>subject | Target    | Article          | Title                                                                                                                                                                                             | Authors                                                                                                                                                         | Publisher                                            | Year | DOI                              |
|-----|---------------|-------------------------|-----------|------------------|---------------------------------------------------------------------------------------------------------------------------------------------------------------------------------------------------|-----------------------------------------------------------------------------------------------------------------------------------------------------------------|------------------------------------------------------|------|----------------------------------|
| 23* | M-16V         | Infant                  | Allergy   | Original article | Effects of administration of bifidobacteria on fecal microflora and clinical symptoms in infants with atopic dermatitis                                                                           | Hattori, Kazuhiro; Yamamoto, Akemi; Sasai, Misa; Taniuchi, Shoichiro; Kojima, Takatsugu; Kobayashi, Yohnosuke; Iwamoto, Hiroshi; Namba, Kyoko; Yaeshima, Tomoko | Arerugi = [Allergy]                                  | 2003 | -                                |
| 24* | M-16V         | <i>In vitro</i>         | Safety    | Original article | Probiotic characteristics and in vitro compatibility of a combination of Bifidobacterium breve M-16 V, Bifidobacterium longum subsp. infantis M-63 and Bifidobacterium longum subsp. longum BB536 | Marco Toscano & Elena De Vecchi & Arianna Gabrieli & Gian Vincenzo Zuccotti & Lorenzo Drago                                                                     | Annals of Microbiology                               | 2015 | 10.1007/s13213-014-0953-5        |
| 25* | M-16V         | Mice                    | Immune    | Original article | Immunobiotic Lactobacillus jensenii elicits anti-inflammatory activity in porcine intestinal epithelial cells by modulating negative regulators of the Toll-like receptor signaling pathway.      | Shimazu T, Villena J, Tohno M, Fujie H, Hosoya S, Shimosato T, Aso H, Suda Y, Kawai Y, Saito T, Makino S, Ikegami S, Itoh H, Kitazawa H.                        | Infect Immun.                                        | 2012 | 10.1128/IAI.05729-11             |
| 26* | M-16V         | <i>In vitro</i>         | Safety    | Original article | Antibiotic susceptibility of bifidobacterial strains distributed in the Japanese market                                                                                                           | Xiao JZ, Takahashi S, Odamaki T, Yaeshima T, Iwatsuki K.                                                                                                        | Biosci Biotechnol Biochem.                           | 2010 | 10.1271/bbb.90659                |
| 27  | M-16V         | Infant                  | Preterm   | Original article | Probiotic Supplementation Dramatically Decreases Infection Deaths in Extremely and Very Low Birth Weight Infants                                                                                  | Hiroaki Sato, Masaki Daigo, Kazuhiro Ohzeki, Hikaru Umezaki, Ayako Kudo, Yuichiro Yamashiro                                                                     | Juntendo Medical Journal                             | 2009 | 10.14789/pjmj.55.136             |
| 28* | M-16V         | Rat                     | Safety    | Original article | Safety Evaluation of Two Probiotic Bifidobacterial Strains, Bifidobacterium breve M-16V and Bifidobacterium infantis M-63, by Oral Toxicity Tests Using Rats                                      | Fumiaki Abe, Tomoko Yaeshima, Keiji Iwatsuki                                                                                                                    | Bioscience and Microflora                            | 2009 | 10.12938/bifidus.28.7            |
| 29* | M-16V         | <i>In vitro</i>         | Stability | Original article | Stability of bifidobacteria in powdered formula                                                                                                                                                   | Fumiaki Abe Hirofumi Miyauchi Ayako Uchijima Tomoko Yaeshima Keiji Iwatsuki                                                                                     | International Journal of Food Science and Technology | 2009 | 10.1111/j.1365-2621.2008.01881.x |

| No. | Intervention                 | Study model/<br>subject | Target               | Article          | Title                                                                                                                                                                                                            | Authors                                                                                                                                                                                                                                                 | Publisher                                                                           | Year | DOI                                |
|-----|------------------------------|-------------------------|----------------------|------------------|------------------------------------------------------------------------------------------------------------------------------------------------------------------------------------------------------------------|---------------------------------------------------------------------------------------------------------------------------------------------------------------------------------------------------------------------------------------------------------|-------------------------------------------------------------------------------------|------|------------------------------------|
| 30* | M-16V                        | Infant                  | Preterm              | Original article | Bifidobacterium breve enhances transforming growth factor beta1 signaling by regulating Smad7 expression in preterm infants                                                                                      | Fujii T, Ohtsuka Y, Lee T, Kudo T, Shoji H, Sato H, Nagata S, Shimizu T, Yamashiro Y.                                                                                                                                                                   | J Pediatr Gastroenterol Nutr.                                                       | 2006 | 10.1097/01.mpg.0000228100.04702.f8 |
| 31* | M-16V                        | Infant                  | Preterm              | Original article | Effects of bifidobacterium breve supplementation on intestinal flora of low birth weight infants                                                                                                                 | Li Y, Shimizu T, Hosaka A, Kaneko N, Ohtsuka Y, Yamashiro Y.                                                                                                                                                                                            | Pediatr Int.                                                                        | 2004 | 10.1111/j.1442-200x.2004.01953.x   |
| 32* | M-16V/<br>Probiotics mixture | Infant                  | Preterm              | Original article | Effect of administration of bifidobacteria on intestinal microbiota in low-birth-weight infants and transition of administered bifidobacteria: a comparison between one-species and three-species administration | Ishizeki, Shinobu; Sugita, Masaoki; Takata, Masaaki; Yaeshima, Tomoko                                                                                                                                                                                   | Anaerobe                                                                            | 2013 | 10.1016/j.anaerobe.2013.08.002     |
| 33  | Probiotics mixture           | Elderly                 | Cognitive function   | Original article | Effect of combined bifidobacteria supplementation and resistance training on cognitive function, body composition and bowel habits of healthy elderly subjects                                                   | Inoue, T; Kobayashi, Y; Mori, N; Sakagawa, M; Xiao, J-Z; Moritani, T; Sakane, N; Nagai, N                                                                                                                                                               | Beneficial microbes                                                                 | 2018 | 10.3920/BM2017.0193                |
| 34* | Probiotics mixture           | Children                | Allergy              | Original article | Bifidobacterium mixture (B longum BB536, B infantis M-63, B breve M-16V) treatment in children with seasonal allergic rhinitis and intermittent asthma                                                           | Miraglia Del Giudice, Michele; Indolfi, Cristiana; Capasso, Michele; Maiello, Nunzia; Decimo, Fabio; Ciprandi, Giorgio                                                                                                                                  | Italian journal of pediatrics                                                       | 2017 | 10.1186/s13052-017-0340-5          |
| 35  | Probiotics mixture           | Children                | Abdominal pain & QOL | Original article | A Mixture of 3 Bifidobacteria Decreases Abdominal Pain and Improves the Quality of Life in Children With Irritable Bowel Syndrome: A Multicenter, Randomized, Double-Blind, Placebo-Controlled, Crossover Trial  | Giannetti, Eleonora; Maglione, Marco; Alessandrella, Annalisa; Strisciuglio, Caterina; De Giovanni, Donatella; Campanozzi, Angelo; Miele, Erasmo; Staiano, Annamaria                                                                                    | Journal of clinical gastroenterology                                                | 2017 | 10.1097/MCG.0000000000000528       |
| 36* | Probiotics mixture           | Infant                  | Allergy              | Original article | Effects of bifidobacterial supplementation to pregnant women and infants in the prevention of allergy development in infants and on fecal microbiota                                                             | Enomoto, Tadao; Sowa, Masanori; Nishimori, Keiji; Shimazu, Shinichiro; Yoshida, Akira; Yamada, Kazuko; Furukawa, Fukumi; Nakagawa, Takemasa; Yanagisawa, Naotake; Iwabuchi, Noriyuki; Odamaki, Toshitaka; Abe, Fumiaki; Nakayama, Jiro; Xiao, Jin-Zhong | Allergology international : official journal of the Japanese Society of Allergology | 2014 | 10.2332/allergolint.13-OA-0683     |

| No. | Intervention | Study model/<br>subject | Target  | Article          | Title                                                                                                                                                           | Authors                                                                                                                                                                                                                                                             | Publisher                          | Year | DOI                           |
|-----|--------------|-------------------------|---------|------------------|-----------------------------------------------------------------------------------------------------------------------------------------------------------------|---------------------------------------------------------------------------------------------------------------------------------------------------------------------------------------------------------------------------------------------------------------------|------------------------------------|------|-------------------------------|
| 37  | Synbiotics   | Infant                  | Allergy | Original article | A specific synbiotic-containing amino acid-based formula restores gut microbiota in non-IgE mediated cow's milk allergic infants: a randomized controlled trial | Wopereis, Harm; van Ampting, Marleen T J; Cetinyurek-Yavuz, Aysun; Slump, Rob; Candy, David C A; Butt, Assad M; Peroni, Diego G; Vandenplas, Yvan; Fox, Adam T; Shah, Neil; Roeselers, Guus; Harthoorn, Lucien F; Michaelis, Louise J; Knol, Jan; West, Christina E | Clinical and translational allergy | 2019 | 10.1186/s13601-019-0267-6     |
| 38  | Synbiotics   | Rat                     | Immune  | Original article | The Combination of Bifidobacterium breve and Three Prebiotic Oligosaccharides Modifies Gut Immune and Endocrine Functions in Neonatal Mice                      | Izumi, Hirohisa; Ehara, Tatsuya; Sugahara, Hirosuke; Matsubara, Takeshi; Mitsuyama, Eri; Nakazato, Yuki; Tsuda, Muneya; Shimizu, Takashi; Odamaki, Toshitaka; Xiao, Jin-Zhong; Takeda, Yasuhiro                                                                     | The Journal of nutrition           | 2019 | 10.1093/jn/nxy248             |
| 39  | Synbiotics   | Infant                  | Allergy | Original article | A specific synbiotic-containing amino acid-based formula in dietary management of cow's milk allergy: a randomized controlled trial                             | Fox, Adam T; Wopereis, Harm; Van Ampting, Marleen T J; Oude Nijhuis, Manon M; Butt, Assad M; Peroni, Diego G; Vandenplas, Yvan; Candy, David C A; Shah, Neil; West, Christina E; Garssen, Johan; Harthoorn, Lucien F; Knol, Jan; Michaelis, Louise J                | Clinical and translational allergy | 2019 | 10.1186/s13601-019-0241-3     |
| 40  | Synbiotics   | Mice                    | Obesity | Original article | Specific synbiotics in early life protect against diet-induced obesity in adult mice                                                                            | Mona Mischke, Tulika Arora, Sebastian Tims, Eefje Engels, Nina Sommer, Kees van Limpt, Annemarie Baars, Raish Oozeer, Annemarie Oosting, Fredrik Bäckhed, Jan Knol                                                                                                  | Diabetes Obesity & Metabolism      | 2018 | 10.1111/dom.13240             |
| 41  | Synbiotics   | Infant                  | Preterm | Original article | Outcomes in preterm small versus appropriate for gestation infants after Bifidobacterium breve M-16 V supplementation                                           | Athalye-Jape, Gayatri; Minaee, Novia; Nathan, Elizabeth; Simmer, Karen; Patole, Sanjay                                                                                                                                                                              | J Matern Fetal Neonatal Med        | 2018 | 10.1080/14767058.2018.1543657 |

| No. | Inter-vention | Study model/<br>subject | Target               | Article          | Title                                                                                                                                                                    | Authors                                                                                                                                                                                                                                              | Publisher                                           | Year | DOI                           |
|-----|---------------|-------------------------|----------------------|------------------|--------------------------------------------------------------------------------------------------------------------------------------------------------------------------|------------------------------------------------------------------------------------------------------------------------------------------------------------------------------------------------------------------------------------------------------|-----------------------------------------------------|------|-------------------------------|
| 42  | Synbiotics    | Children                | Microbiota           | Original article | A synbiotic mixture of scGOS/lcFOS and Bifidobacterium breve M-16V increases faecal Bifidobacterium in healthy young children                                            | Kosuwon, P; Lao-Araya, M; Uthaisangsook, S; Lay, C; Bindels, J; Knol, J; Chatchatee, P                                                                                                                                                               | Beneficial microbes                                 | 2018 | 10.3920/BM2017.0110           |
| 43  | Synbiotics    | Mice                    | Rotavirus infections | Original article | Preventive Effect of a Synbiotic Combination of Galacto- and Fructooligosaccharides Mixture With Bifidobacterium breve M-16V in a Model of Multiple Rotavirus Infections | Rigo-Adrover, Maria Del Mar; van Limpt, Kees; Knipping, Karen; Garssen, Johan; Knol, Jan; Costabile, Adele; Franch, Àngels; Castell, Margarida; Pérez-Cano, Francisco José                                                                           | Frontiers in immunology                             | 2018 | 10.3389/fimmu.2018.01318      |
| 44  | Synbiotics    | Infant                  | Allergy              | Original article | A synbiotic-containing amino-acid-based formula improves gut microbiota in non-IgE-mediated allergic infants                                                             | Candy, David C A; Van Ampting, Marleen T J; Oude Nijhuis, Manon M; Wopereis, Harm; Butt, Assad M; Peroni, Diego G; Vandenplas, Yvan; Fox, Adam T; Shah, Neil; West, Christina E; Garssen, Johan; Harthoorn, Lucien F; Knol, Jan; Michaelis, Louise J | Pediatric research                                  | 2017 | 10.1038/pr.2017.270           |
| 45  | Synbiotics    | Mice                    | Allergy              | Original article | Dietary, nondigestible oligosaccharides and Bifidobacterium breve M-16V suppress allergic inflammation in intestine via targeting dendritic cell maturation              | de Kivit, Sander; Kostadinova, Atanaska I; Kerperien, JoAnn; Morgan, Mary E; Muruzabal, Veronica Ayechu; Hofman, Gerard A; Knippels, Leon M J; Kraneveld, Aletta D; Garssen, Johan; Willemsen, Linette E M                                           | Journal of leukocyte biology                        | 2017 | 10.1189/jlb.3A0516-236R       |
| 46  | Synbiotics    | Infant                  | Microbiota           | Original article | Effect of Synbiotic on the Gut Microbiota of Cesarean Delivered Infants: A Randomized, Double-blind, Multicenter Study                                                   | Chua, Mei Chin; Ben-Amor, Kaouther; Lay, Christophe; Neo, Anne G E; Chiang, Wei Chin; Rao, Rajeshwar; Chew, Charmaine; Chaithongwongwatthana, Surasith; Khemapech, Nipon; Knol, Jan; Chongsrisawat, Voranush                                         | Journal of pediatric gastroenterology and nutrition | 2017 | 10.1097/MPG.00000000000001623 |
| 47  | Synbiotics    | Rat                     | Rotavirus infections | Original article | A combination of scGOS/lcFOS with Bifidobacterium breve M-16V protects suckling rats from rotavirus gastroenteritis                                                      | Rigo-Adrover, M; Saldaña-Ruiz, S; van Limpt, K; Knipping, K; Garssen, J; Knol, J; Franch, A; Castell, M; Pérez-Cano, F J                                                                                                                             | European journal of nutrition                       | 2017 | 10.1007/s00394-016-1213-1     |



| No. | Intervention | Study model/<br>subject | Target  | Article          | Title                                                                                                                                                                                                                             | Authors                                                                                                                                                                                                       | Publisher                                          | Year | DOI                           |
|-----|--------------|-------------------------|---------|------------------|-----------------------------------------------------------------------------------------------------------------------------------------------------------------------------------------------------------------------------------|---------------------------------------------------------------------------------------------------------------------------------------------------------------------------------------------------------------|----------------------------------------------------|------|-------------------------------|
| 48  | Synbiotics   | Mice                    | Allergy | Original article | A Specific Mixture of Fructo-Oligosaccharides and Bifidobacterium breve M-16V Facilitates Partial Non-Responsiveness to Whey Protein in Mice Orally Exposed to $\beta$ -Lactoglobulin-Derived Peptides                            | Kostadinova, Atanaska I; Meulenbroek, Laura A P M; van Esch, Betty C A M; Hofman, Gerard A; Garssen, Johan; Willemsen, Linette E M; Knippels, Léon M J                                                        | Frontiers in immunology                            | 2017 | 10.3389/fimmu.2016.00673      |
| 49  | Synbiotics   | Infant                  | Growth  | Original article | Infant formula containing galacto-and fructo-oligosaccharides and Bifidobacterium breve M-16V supports adequate growth and tolerance in healthy infants in a randomised, controlled, double-blind, prospective, multicentre study | Abrahamse-Berkeveld, M; Alles, M; Franke-Beckmann, E; Helm, K; Knecht, R; Köllges, R; Sandner, B; Knol, J; Ben Amor, K; Bufe, A                                                                               | Journal of nutritional science                     | 2016 | 10.1017/jns.2016.35           |
| 50  | Synbiotics   | Mice                    | Allergy | Original article | Post-sensitization administration of non-digestible oligosaccharides and Bifidobacterium breve M-16V reduces allergic symptoms in mice                                                                                            | van Esch, Betty C A M; Abbring, Suzanne; Diks, Mara A P; Dingjan, Gemma M; Harthoorn, Lucien F; Vos, A Paul; Garssen, Johan                                                                                   | Immunity, inflammation and disease                 | 2016 | 10.1002/iid3.101              |
| 51  | Synbiotics   | Mice                    | Allergy | Original article | The development of allergic inflammation in a murine house dust mite asthma model is suppressed by synbiotic mixtures of non-digestible oligosaccharides and Bifidobacterium breve M-16V                                          | Verheijden, K A T; Willemsen, L E M; Braber, S; Leusink-Muis, T; Jeurink, P V; Garssen, J; Kraneveld, A D; Folkerts, G                                                                                        | European journal of nutrition                      | 2016 | 10.1007/s00394-015-0928-8     |
| 52  | Synbiotics   | Infant                  | Allergy | Original article | Synbiotics-supplemented amino acid-based formula supports adequate growth in cow's milk allergic infants                                                                                                                          | Burks, A Wesley; Harthoorn, Lucien F; Van Ampting, Marleen T J; Oude Nijhuis, Manon M; Langford, Jane E; Wopereis, Harm; Goldberg, Steven B; Ong, Peck Y; Essink, Brandon J; Scott, Robert B; Harvey, Bryan M | Pediatric allergy and immunology                   | 2015 | 10.1111/pai.12390             |
| 53  | Synbiotics   | Human                   | Allergy | Original article | Novel immunotherapy approaches to food allergy                                                                                                                                                                                    | Hayen, Simone M; Kostadinova, Atanaska I; Garssen, Johan; Otten, Henny G; Willemsen, Linette E M                                                                                                              | Current opinion in allergy and clinical immunology | 2014 | 10.1097/ACI.00000000000000109 |

| No. | Intervention | Study model/<br>subject | Target  | Article          | Title                                                                                                                        | Authors                                                                                                                                                                                              | Publisher                         | Year | DOI                              |
|-----|--------------|-------------------------|---------|------------------|------------------------------------------------------------------------------------------------------------------------------|------------------------------------------------------------------------------------------------------------------------------------------------------------------------------------------------------|-----------------------------------|------|----------------------------------|
| 54  | Synbiotics   | Infant                  | Allergy | Original article | Intestinal epithelium-derived galectin-9 is involved in the immunomodulating effects of nondigestible oligosaccharides       | de Kivit, Sander; Kraneveld, Aletta D; Knippels, Leon M J; van Kooyk, Yvette; Garssen, Johan; Willemsen, Linette E M                                                                                 | Journal of innate immunity        | 2013 | 10.1159/000350515                |
| 55* | Synbiotics   | Infant                  | Allergy | Original article | No detectable beneficial systemic immunomodulatory effects of a specific synbiotic mixture in infants with atopic dermatitis | van der Aa, L B; Lutter, R; Heymans, H S A; Smids, B S; Dekker, T; van Aalderen, W M C; Sillevs Smitt, J H; Knippels, L M J; Garssen, J; Nauta, A J; Sprikkelman, A B                                | Clinical and experimental allergy | 2012 | 10.1111/j.1365-2222.2011.03890.x |
| 56  | Synbiotics   | Human/<br>Rat           | Allergy | Original article | Galectin-9 induced by dietary synbiotics is involved in suppression of allergic symptoms in mice and humans                  | de Kivit, S; Saeland, E; Kraneveld, A D; van de Kant, H J G; Schouten, B; van Esch, B C A M; Knol, J; Sprikkelman, A B; van der Aa, L B; Knippels, L M J; Garssen, J; van Kooyk, Y; Willemsen, L E M | Allergy                           | 2012 | 10.1111/j.1398-9995.2011.02771.x |
| 57* | Synbiotics   | Infant                  | Allergy | Original article | Synbiotics prevent asthma-like symptoms in infants with atopic dermatitis                                                    | van der Aa, L B; van Aalderen, W M C; Heymans, H S A; Henk Sillevs Smitt, J; Nauta, A J; Knippels, L M J; Ben Amor, K; Sprikkelman, A B                                                              | Allergy                           | 2011 | 10.1111/j.1398-9995.2010.02416.x |
| 58  | Synbiotics   | Adult                   | Allergy | Original article | Synbiotics reduce allergen-induced T-helper 2 response and improve peak expiratory flow in allergic asthmatics               | van de Pol, M A; Lutter, R; Smids, B S; Weersink, E J M; van der Zee, J S                                                                                                                            | Allergy                           | 2011 | 10.1111/j.1398-9995.2010.02454.x |
| 59  | Synbiotics   | Infant                  | Allergy | Original article | Effect of a new synbiotic mixture on atopic dermatitis in infants: a randomized-controlled trial                             | van der Aa, L B; Heymans, H S; van Aalderen, W M; Sillevs Smitt, J H; Knol, J; Ben Amor, K; Goossens, D A; Sprikkelman, A B                                                                          | Clinical and experimental allergy | 2010 | 10.1111/j.1365-2222.2010.03465.x |
| 60  | Synbiotics   | Mice                    | Allergy | Original article | Cow milk allergy symptoms are reduced in mice fed dietary synbiotics during oral sensitization with whey                     | Schouten, Bastiaan; van Esch, Betty C A M; Hofman, Gerard A; van Doorn, Suzan A C M; Knol, Jan; Nauta, Alma J; Garssen, Johan; Willemsen, Linette E M; Knippels, Léon M J                            | The Journal of nutrition          | 2009 | 10.3945/jn.109.108514            |

| No.                                                  | Inter-vention                               | Study model/<br>subject | Target     | Article          | Title                                                                                                                                                                                                      | Authors                                                                                                                                | Publisher                   | Year | DOI                                                                                                                                       |
|------------------------------------------------------|---------------------------------------------|-------------------------|------------|------------------|------------------------------------------------------------------------------------------------------------------------------------------------------------------------------------------------------------|----------------------------------------------------------------------------------------------------------------------------------------|-----------------------------|------|-------------------------------------------------------------------------------------------------------------------------------------------|
| <i>Additional articles not deposited in database</i> |                                             |                         |            |                  |                                                                                                                                                                                                            |                                                                                                                                        |                             |      |                                                                                                                                           |
| 61*                                                  | M-16V                                       | Infant                  | Microbiota | Original article | Effects of oral administration of Bifidobacterium breve on development of intestinal microflora in extremely premature infants.                                                                            | Akiyama, K.; Hosono, S.; Takahashi, E.; Ishizeki, S.; Takigawa, I.; Imura, S.; Yamauchi, K.; Yaeshima, T.; Hayasawa, H.; Shimamura, S. | Acta Neonatol Japonica      | 1994 | -                                                                                                                                         |
| 62*                                                  | <i>B. longum</i> BB536 (compare with M-16V) | Infant                  | Microbiota | Original article | Effects of administration of Bifidobacterium in extremely premature infants. Development of intestinal microflora by orally administered Bifidobacterium longum (in comparison with Bifidobacterium breve) | Akiyama, K.; Shimada, M.; Ishizeki, S.; Takigawa, I.; Imura, S.; Yamauchi, K.; Hatano, M.; Abe, N.; Yaeshima, T.; Hayasawa, H.         | Acta Neonatol Japonica      | 1994 | -                                                                                                                                         |
| 63*                                                  | M-16V                                       | <i>In vitro</i>         | Immune     | Original article | Transforming growth factor- $\beta$ : an important cytokine in the mucosal immune response.                                                                                                                | Ohtsuka, Y.; Sanderson, I.R.                                                                                                           | Curr Opin Gastroenterol     | 2000 | <a href="https://www.ncbi.nlm.nih.gov/pubmed/17031135">https://www.ncbi.nlm.nih.gov/pubmed/17031135</a>                                   |
| 64*                                                  | M-16V                                       | Infant                  | Preterm    | Original article | Bifidobacteria prevents necrotizing enterocolitis and infection in preterm infants.                                                                                                                        | Satoh, Y.; Shinohara, K.; Umezaki, H.; Shoji, H.; Satoh, H.; Ohtsuka, Y.; Shiga, S.; Nagata, S.; Shimizu, T.; Yamashiro, Y.            | Int J Probiotics Prebiotics | 2007 | <a href="http://www.nchpjournal.com/manuscript/uploads/article_727.pdf">http://www.nchpjournal.com/manuscript/uploads/article_727.pdf</a> |

\*Article numbers with asterisk were selected and included in this review.
